# Supplementary material
Source: PubMed Central journal article supplement (PMC5272817)
Supplement: NIHMS832480-supplement-2.pdf [file NIHMS832480-supplement-2.pdf]

**Supplemental Table 1. Statistical Results and 95% Confidence Interval of the Effect Size**

| <b>HI Behavior During Infancy</b>         |                         |                 |          |                              |               |
|-------------------------------------------|-------------------------|-----------------|----------|------------------------------|---------------|
| <b>Variable</b>                           | <b>Effect</b>           | <b>F [df]</b>   | <b>p</b> | <b><math>\eta_p^2</math></b> | <b>95% CI</b> |
| <b>Freezing</b>                           | Age                     | F[1,6] = 2.53   | 0.16     | 0.29                         | [0.00, 0.58]  |
|                                           | Group X Condition       | F[2,18] = 2.89  | 0.08     | 0.24                         | [0.00, 0.43]  |
| <b>Hostile</b>                            | Condition X Age         | F[2,18] = 6.79  | 0.006    | 0.43                         | [0.09, 0.59]  |
| <b>Anxiety-like</b>                       | Age                     | F[2,18] = 0.15  | 0.7      | 0.008                        | [0.00, 0.12]  |
|                                           | Group X Condition       | F[2,18] = 4.08  | 0.035    | 0.31                         | [0.01, 0.49]  |
| <b>Self-directed</b>                      | Group X Condition X Age | F[2,18] = 3.53  | 0.05     | 0.28                         | [0.00, 0.47]  |
|                                           | Group (4.5mths)         | F[1,8] = 11.34  | 0.015    | 0.65                         | [0.12, 0.75]  |
| <b>Affiliative</b>                        | Group                   | F[1,18] = 4.11  | 0.05     | 0.19                         | [0.00, 0.59]  |
| <b>Stereotypies</b>                       | Group                   | F[1,18] = 0.01  | 0.9      | 0.001                        | [0.00, 0.04]  |
| <b>HI Behavior During Adulthood</b>       |                         |                 |          |                              |               |
| <b>Freezing</b>                           | Condition               | F[2,20] = 48.77 | <0.001   | 0.83                         | [0.66, 0.88]  |
|                                           | Group                   | F[1,10] = 4.89  | 0.051    | 0.33                         | [0.00, 0.57]  |
| <b>Hostile</b>                            | Group X Condition       | F[2,20] = 4.29  | 0.033    | 0.30                         | [0.02, 0.48]  |
| <b>Anxiety-like</b>                       | Condition               | F[2,20] = 33.27 | <0.001   | 0.77                         | [0.55, 0.83]  |
|                                           | Group                   | F[1,10] = 4.70  | 0.05     | 0.32                         | [0.01, 0.56]  |
| <b>Self-directed</b>                      | Group                   | F[1,10] = 5.87  | 0.036    | 0.37                         | [0.02, 0.60]  |
| <b>Affiliative</b>                        | Group                   | F[1,10] = 1.21  | 0.30     | 0.10                         | [0.00, 0.38]  |
| <b>Stereotypies</b>                       | Group                   | F[1,10] = 0.04  | 0.84     | 0.004                        | [0.00, 0.13]  |
| <b>Cortisol Response During Adulthood</b> |                         |                 |          |                              |               |
| <b>HI Stressor</b>                        | Group X Time            | F[1,10] = 7.93  | 0.018    | 0.44                         | [0.05, 0.65]  |
| <b>Non-stress Day</b>                     | Time                    | F[1,10] = 13.61 | 0.004    | 0.58                         | [0.16, 0.73]  |
|                                           | Group                   | F[1,10] = 5.91  | 0.035    | 0.37                         | [0.02, 0.60]  |
| <b>Diurnal Rhythm</b>                     | Group X Time            | F[2,20] = 9.75  | 0.001    | 0.49                         | [0.17, 0.63]  |

HI: Human Intruder Paradigm; df: degrees of freedom;  $\eta_p^2$ : partial eta squared effect size; 95% CI: 95% confidence interval for the effect size.
