# Supplementary material
Source: PubMed Central journal article supplement (PMC5272817)
Supplement: NIHMS832480-supplement-3.pdf [file NIHMS832480-supplement-3.pdf]

**Supplemental Table 2. Individual Scores on the Human Intruder Paradigm During Infancy**

| Subjects   | Freezing        |       |      |                   |       |       | Hostile         |      |      |                   |     |       | Anxious         |     |      |                   |     |      | Self-directed   |       |       |                   |       |       |
|------------|-----------------|-------|------|-------------------|-------|-------|-----------------|------|------|-------------------|-----|-------|-----------------|-----|------|-------------------|-----|------|-----------------|-------|-------|-------------------|-------|-------|
|            | <u>2 months</u> |       |      | <u>4.5 months</u> |       |       | <u>2 months</u> |      |      | <u>4.5 months</u> |     |       | <u>2 months</u> |     |      | <u>4.5 months</u> |     |      | <u>2 months</u> |       |       | <u>4.5 months</u> |       |       |
|            | A               | P     | S    | A                 | P     | S     | A               | P    | S    | A                 | P   | S     | A               | P   | S    | A                 | P   | S    | A               | P     | S     | A                 | P     | S     |
| Neo-C-1    | 0.0             | 2.47  | 0.0  | 1.9               | 5.37  | 0.0   | 0.0             | 0.5  | 13.5 | 0.0               | 10  | 34    | 0.0             | 0.0 | 7    | 0.0               | 0.0 | 6    | 0.0             | 3.04  | 9.94  | 1.9               | 0.0   | 20.64 |
| Neo-C-2    | 0.0             | 0.0   | 0.0  | 0.0               | 0.0   | 0.0   | 0.0             | 1.5  | 1    | 1.75              | 8   | 7     | 0.25            | 0.0 | 1    | 0.0               | 0.5 | 5.5  | 0.0             | 0.0   | 2.79  | 6.5               | 3     | 5.44  |
| Neo-C-3    | 0.0             | 2.25  | 0.0  | ---               | ---   | ---   | 0.0             | 0.0  | 0.5  | ---               | --- | ---   | 0.0             | 0.0 | 4    | ---               | --- | ---  | 2.5             | 5.5   | 0.0   | ---               | ---   | ---   |
| Neo-C-4    | 0.0             | 0.0   | 0.0  | ---               | ---   | ---   | 0.0             | 0.0  | 2.5  | ---               | --- | ---   | 0.0             | 0.0 | 0.0  | ---               | --- | ---  | 0.0             | 0.0   | 0.0   | ---               | ---   | ---   |
| Neo-C-5    | 0.0             | 0.0   | 0.0  | 0.0               | 20.73 | 3.92  | 0.0             | 0.0  | 0.5  | 0.0               | 0.0 | 23    | 0.25            | 0.0 | 4.5  | 0.0               | 0.0 | 5    | 0.0             | 0.0   | 0.0   | 0.0               | 0.0   | 6.87  |
| Neo-C-6    | 0.0             | 0.0   | 0.0  | 0.0               | 38.59 | 12.11 | 0.0             | 0.0  | 0.0  | 0.0               | 0.0 | 20.67 | 0.0             | 0.0 | 2    | 0.5               | 0.0 | 6.5  | 2               | 0.0   | 12.91 | 9.5               | 8     | 3.2   |
| Neo-Hibo-1 | 0.0             | 3.78  | 0.0  | 1.55              | 8.57  | 0.0   | 0.0             | 0.0  | 1    | 3.25              | 0.0 | 1.75  | 0.5             | 6   | 6.5  | 0.0               | 0.0 | 10.5 | 3.56            | 2.82  | 14.27 | 2.52              | 13.04 | 32.23 |
| Neo-Hibo-2 | 0.0             | 30.58 | 0.0  | 1.22              | 2.59  | 0.0   | 0.0             | 0.0  | 5.5  | 0.0               | 2   | 24.5  | 0.0             | 0.0 | 6.5  | 0.0               | 2.5 | 7    | 0.0             | 0.0   | 0.0   | 0.0               | 26.5  | 10.16 |
| Neo-Hibo-3 | 0.84            | 1.24  | 0.0  | ---               | ---   | ---   | 0.0             | 2    | 4.5  | ---               | --- | ---   | 0.0             | 2   | 2.5  | ---               | --- | ---  | 0.0             | 1.5   | 0.0   | ---               | ---   | ---   |
| Neo-Hibo-4 | 0.0             | 36.36 | 5.07 | ---               | ---   | ---   | 0.0             | 2.25 | 1.5  | ---               | --- | ---   | 0.5             | 1.5 | 15   | ---               | --- | ---  | 0.0             | 15.48 | 16.97 | ---               | ---   | ---   |
| Neo-Hibo-5 | 0.0             | 1.4   | 0.0  | 0.0               | 14.64 | 0.0   | 0.0             | 0.0  | 0.5  | 0.0               | 0.0 | 7.75  | 0.0             | 0.5 | 10   | 0.0               | 1.5 | 4    | 8.77            | 1.02  | 6.97  | 7.44              | 18.91 | 8.84  |
| Neo-Hibo-6 | 0.0             | 2.71  | 0.0  | 0.0               | 3.27  | 0.0   | 0.0             | 1.5  | 10   | 0.0               | 2.5 | 60    | 0.0             | 0.0 | 10.5 | 0.0               | 0.0 | 8    | 13.38           | 4.92  | 6.35  | 0.0               | 10.23 | 7.34  |

Nontransformed data, averaged across the two days of testing, for all subjects during infancy (2, 4.5 months) on the Human Intruder paradigm conditions Alone (A), Profile (P), and Stare (S). Freezing is measured in duration (seconds), whereas Hostile, Anxious, and Self-directed behaviors are measured in frequency count.
