# Supplementary material
Source: PubMed Central journal article supplement (PMC5272817)
Supplement: NIHMS832480-supplement-4.pdf [file NIHMS832480-supplement-4.pdf]

**Supplemental Table 3. Individual Scores on the Human Intruder Paradigm During Adulthood**

| <b>Subjects</b> | <b>Freezing</b> |          |          | <b>Hostile</b> |          |          | <b>Anxious</b> |          |          | <b>Self-directed</b> |          |          |
|-----------------|-----------------|----------|----------|----------------|----------|----------|----------------|----------|----------|----------------------|----------|----------|
|                 | <b>A</b>        | <b>P</b> | <b>S</b> | <b>A</b>       | <b>P</b> | <b>S</b> | <b>A</b>       | <b>P</b> | <b>S</b> | <b>A</b>             | <b>P</b> | <b>S</b> |
| Neo-C-1         | 0.0             | 108.21   | 0.0      | 0.0            | 1        | 15       | 0.0            | 0.0      | 6        | 4.97                 | 0.0      | 0.0      |
| Neo-C-2         | 0.0             | 296.64   | 0.0      | 0.0            | 0.0      | 55       | 4              | 0.0      | 44       | 4.15                 | 0.0      | 5.25     |
| Neo-C-3         | 0.0             | 291.86   | 0.0      | 0.0            | 2        | 18       | 0.0            | 0.0      | 6        | 0.0                  | 0.0      | 5.95     |
| Neo-C-4         | 0.0             | 213.81   | 0.0      | 0.0            | 0.0      | 26       | 0.0            | 0.0      | 7        | 0.0                  | 0.0      | 4.57     |
| Neo-C-5         | 0.0             | 120.55   | 0.0      | 0.0            | 0.0      | 10       | 0.0            | 0.0      | 12       | 4.47                 | 10.81    | 0.0      |
| Neo-C-7         | 0.0             | 75.97    | 0.0      | 0.0            | 0.0      | 52       | 0.0            | 0.0      | 0.0      | 2.44                 | 0.0      | 0.0      |
| Neo-Hibo-1      | 0.0             | 72.38    | 0.0      | 0.0            | 0.0      | 0.0      | 5              | 8        | 42       | 0.0                  | 9.64     | 88.72    |
| Neo-Hibo-2      | 0.0             | 119.05   | 0.0      | 0.0            | 3        | 7        | 18             | 9        | 18       | 75.94                | 5.81     | 109.47   |
| Neo-Hibo-3      | 0.0             | 103.14   | 0.0      | 0.0            | 0.0      | 17       | 0.0            | 0.0      | 4        | 16.82                | 0.0      | 0.0      |
| Neo-Hibo-4      | 0.0             | 82.44    | 0.0      | 0.0            | 0.0      | 19       | 2              | 10       | 23       | 0.0                  | 11.18    | 13.55    |
| Neo-Hibo-5      | 0.0             | 85.91    | 0.0      | 7              | 3        | 21       | 0.0            | 0.0      | 5        | 133.98               | 117.51   | 302.74   |
| Neo-Hibo-6      | 0.0             | 111.5    | 0.0      | 4              | 4        | 39       | 3              | 2        | 34       | 4.69                 | 2.74     | 0.0      |

Nontransformed data for all subjects during adulthood (6-8 years) on the Human Intruder paradigm conditions Alone (A), Profile (P), and Stare (S). Freezing is measured in duration (seconds), whereas Hostile, Anxious, and Self-directed behaviors are measured in frequency count. Neo-C-7 has also been reported as Neo-C-11 in other publications (Weiss & Bachevalier, 2016; Weiss et al, 2016).
