# Supplementary material
Source: PubMed Central journal article supplement (PMC5272817)
Supplement: NIHMS832480-supplement-5.pdf [file NIHMS832480-supplement-5.pdf]

**Supplemental Table 4. Cortisol Levels for Individuals During Adulthood**

| <b>Subjects</b> | <b>Baseline / Non-stress</b> |               | <b>Human Intruder Paradigm</b> |                    | <b>Diurnal Rhythm</b> |                |                   |
|-----------------|------------------------------|---------------|--------------------------------|--------------------|-----------------------|----------------|-------------------|
|                 | <b>Lights-On</b>             | <b>+30min</b> | <b>Pre-stress</b>              | <b>Post-stress</b> | <b>Lights-On</b>      | <b>Mid-day</b> | <b>Lights-Off</b> |
| Neo-C-1         | 25.74                        | 22.72         | 20.52                          | 24.55              | 19.32                 | 7.79           | 2.50              |
| Neo-C-2         | 29.59                        | 29.48         | 27.93                          | 32.58              | 21.25                 | 11.55          | 4.88              |
| Neo-C-3         | 30.20                        | 23.30         | 23.80                          | 32.54              | 23.09                 | 7.92           | 2.50              |
| Neo-C-4         | 21.31                        | 16.18         | 17.53                          | 28.61              | 22.59                 | 7.35           | 2.50              |
| Neo-C-5         | 28.34                        | 22.37         | 26.87                          | 35.84              | 23.08                 | 10.57          | 2.50              |
| Neo-C-7         | 31.56                        | 27.58         | 24.48                          | 41.08              | 21.54                 | 10.18          | 3.52              |
| Neo-Hibo-1      | 21.25                        | 18.83         | 25.22                          | 27.26              | 19.13                 | 9.72           | 9.26              |
| Neo-Hibo-2      | 14.30                        | 13.42         | 18.22                          | 14.15              | 15.76                 | 9.80           | 2.50              |
| Neo-Hibo-3      | 15.14                        | 14.85         | 21.15                          | 14.84              | 18.71                 | 16.27          | 3.09              |
| Neo-Hibo-4      | 25.26                        | 27.06         | 24.51                          | 30.78              | 15.30                 | 9.69           | 2.50              |
| Neo-Hibo-5      | 27.52                        | 22.30         | 28.91                          | 33.58              | 22.47                 | 15.74          | 4.95              |
| Neo-Hibo-6      | 18.13                        | 9.63          | 17.69                          | 21.73              | 15.70                 | 8.60           | 3.98              |

Cortisol levels ( $\mu\text{g}/\text{dl}$ ) for all subjects during adulthood (6-8 years). Cortisol was measured by Diagnostic Systems Laboratories (DSL) radioimmunoassay for Baseline/Non-stress and Human Intruder Paradigm days, whereas Diurnal Rhythm of cortisol was measured using liquid chromatography - mass spectrometry (LC-MS). Neo-C-7 has also been reported as Neo-C-11 in other publications (Weiss & Bachevalier, 2016; Weiss et al, 2016).
